# Supplementary material
Source: PubMed Central journal article supplement (PMC9354647)
Supplement: NIHMS1818210-supplement-2.pdf [file NIHMS1818210-supplement-2.pdf]

## Supplemental Figure 1

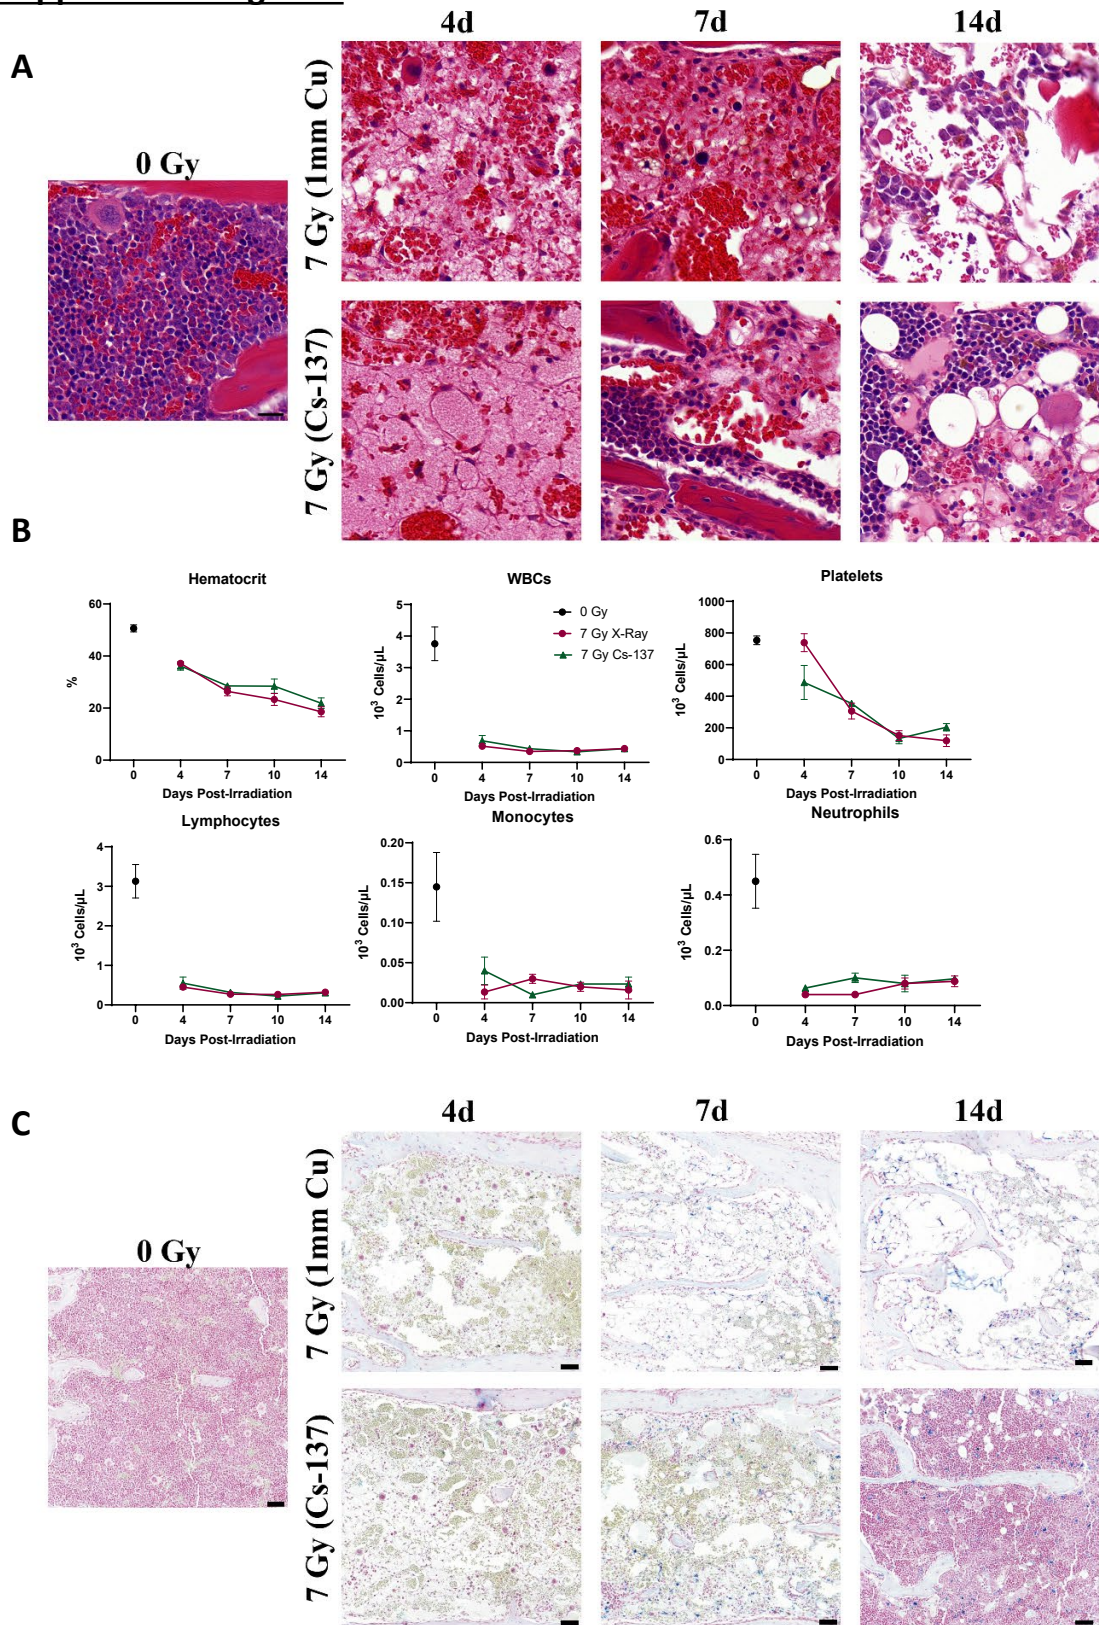

**Supplemental Figure 1:** (A) Representative H&E-stained sternal bone marrow from 4-14 days post-irradiation. (B) Complete blood count parameters from 4-14 days post-irradiation. (C) Prussian Blue-stained sternal bone marrow from 4-14 days post-irradiation.

## Supplemental Figure 2

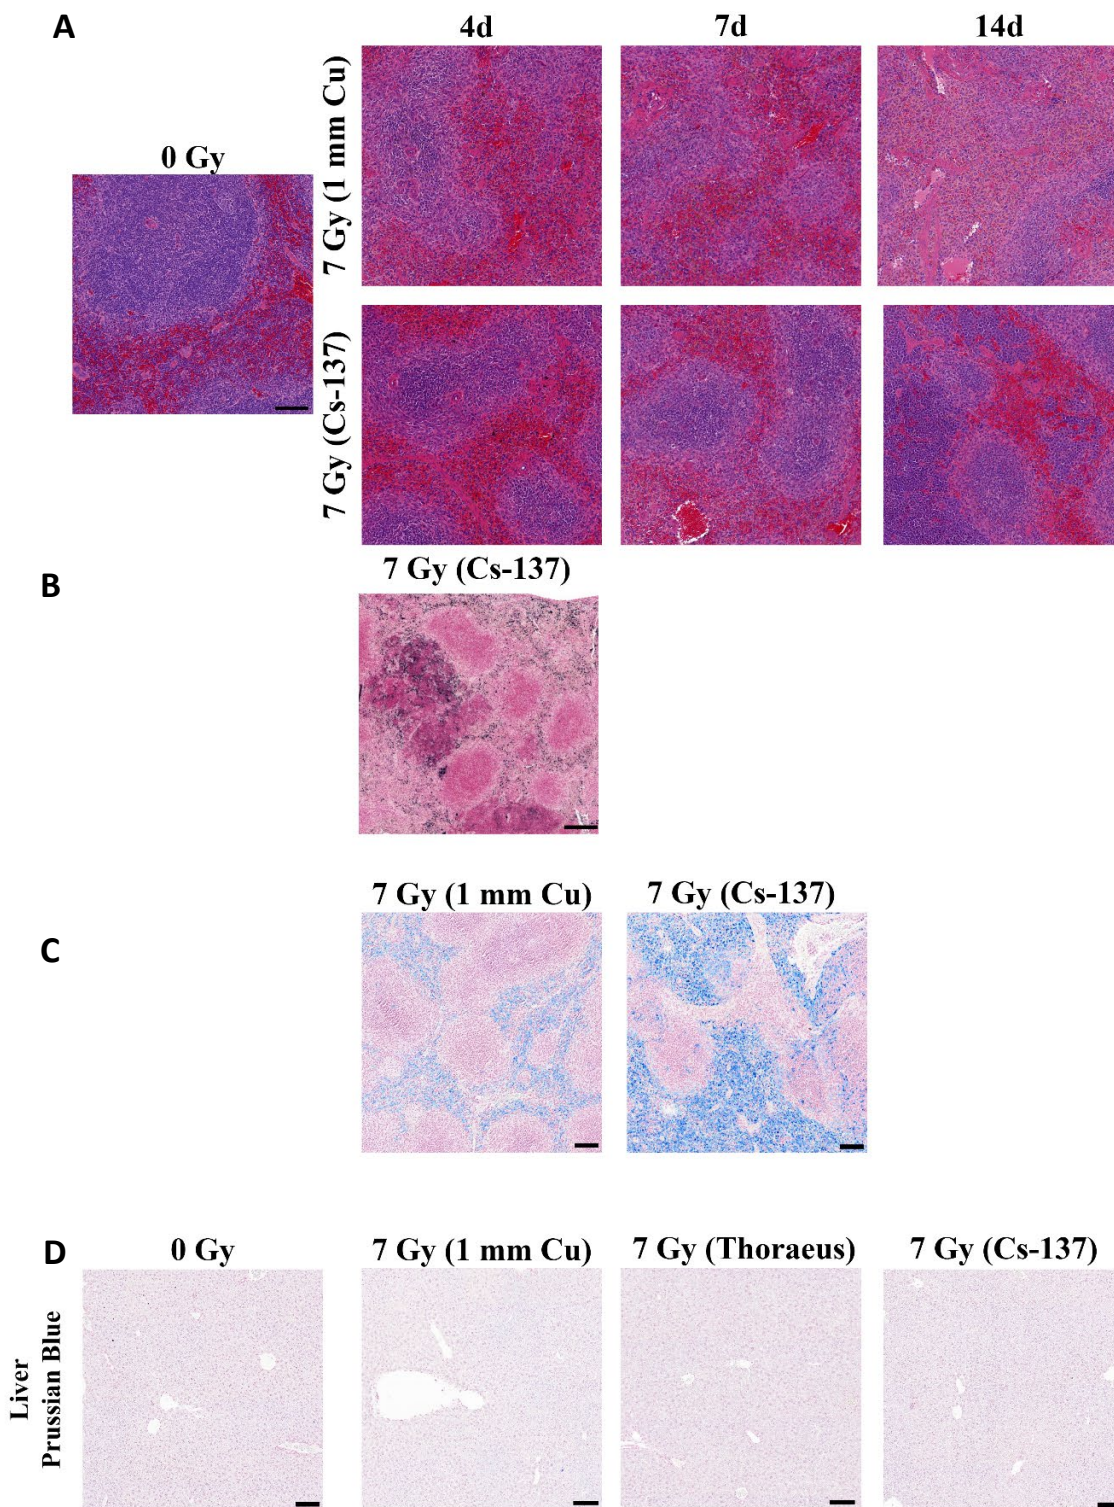

**Supplemental Figure 2:** (A) Representative H&E-stained spleens from 4-14 days post-irradiation. (B) Representative myeloperoxidase immunohistochemistry in splenic nodules 10 days post-irradiation with  $^{137}\text{Cs}$ . (C) Representative Prussian Blue-stained spleens 14 days post-irradiation. (D) Prussian Blue-stained livers 10 days post-irradiation.

## Supplemental Figure 3

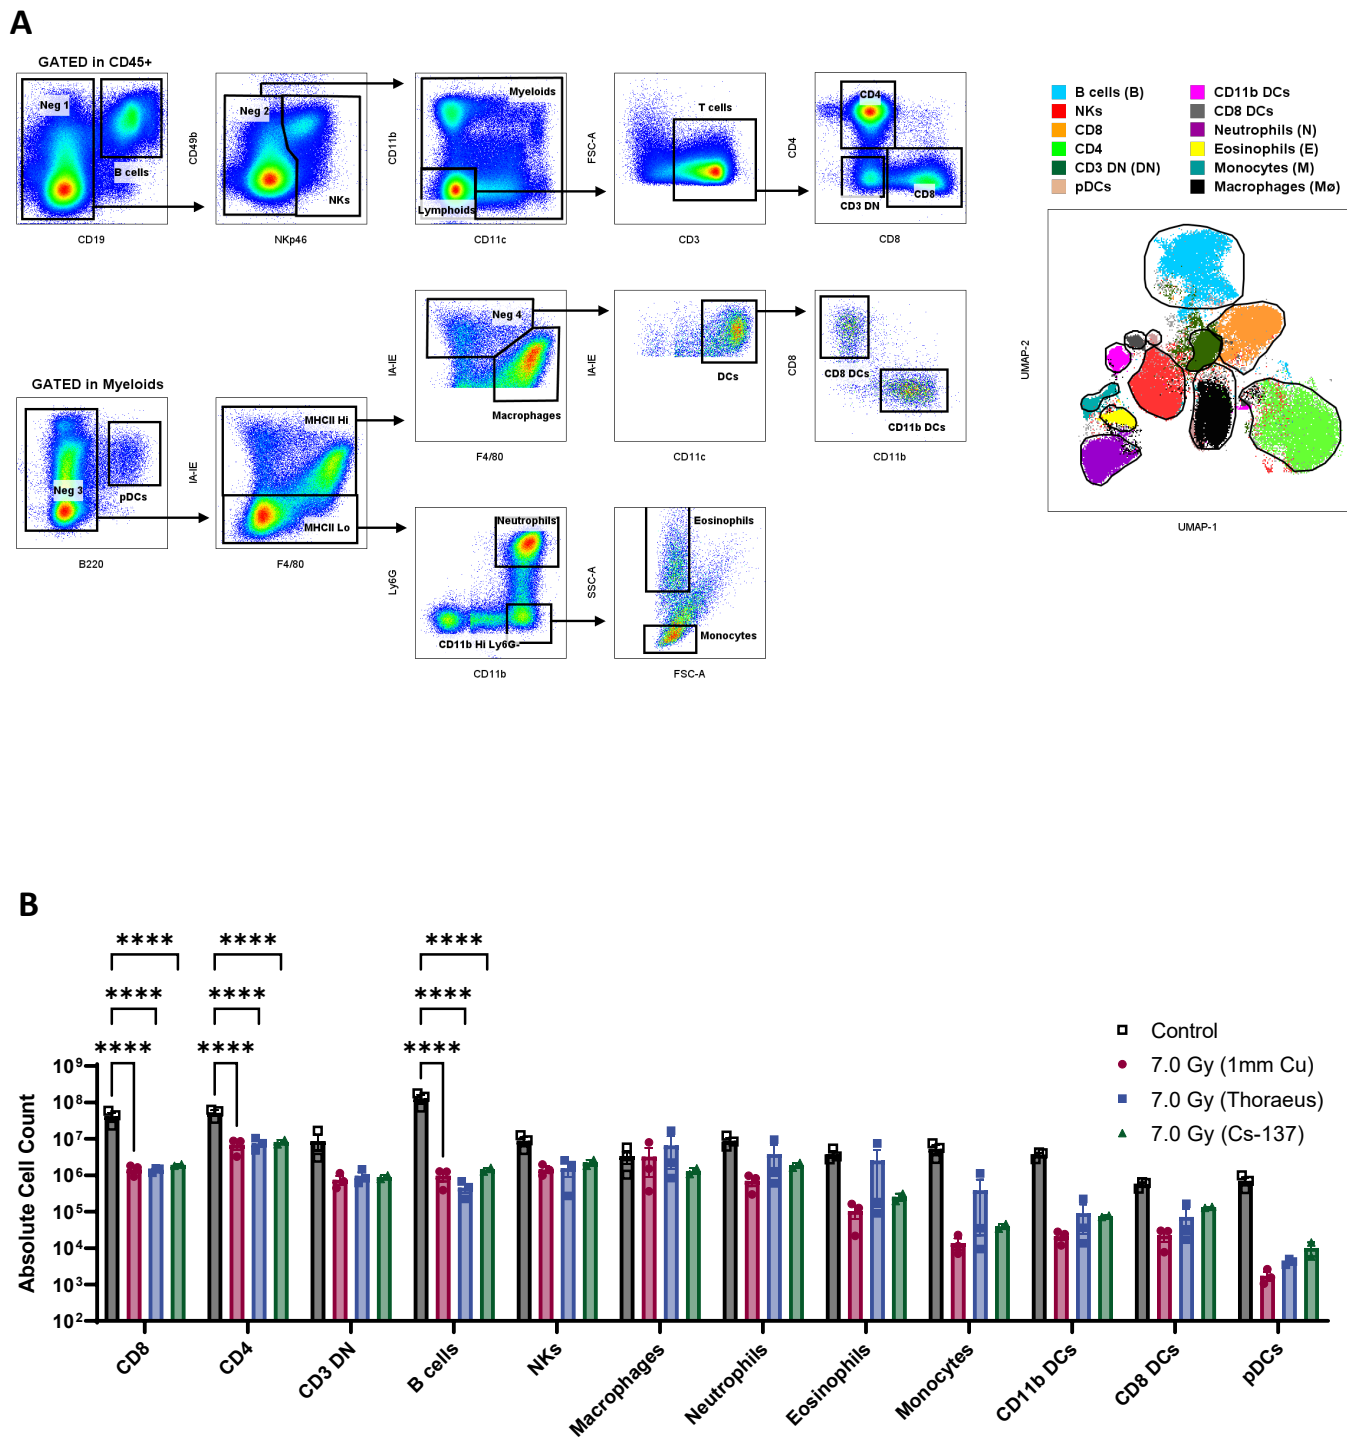

**Supplemental Figure 3:** (A) Manual Gating strategy used to validate UMAP clusters. Manual gating was overlaid over the UMAP clustering at right. (B) Absolute counts of splenic immune populations 10-days post-irradiation.

## Supplemental Figure 4

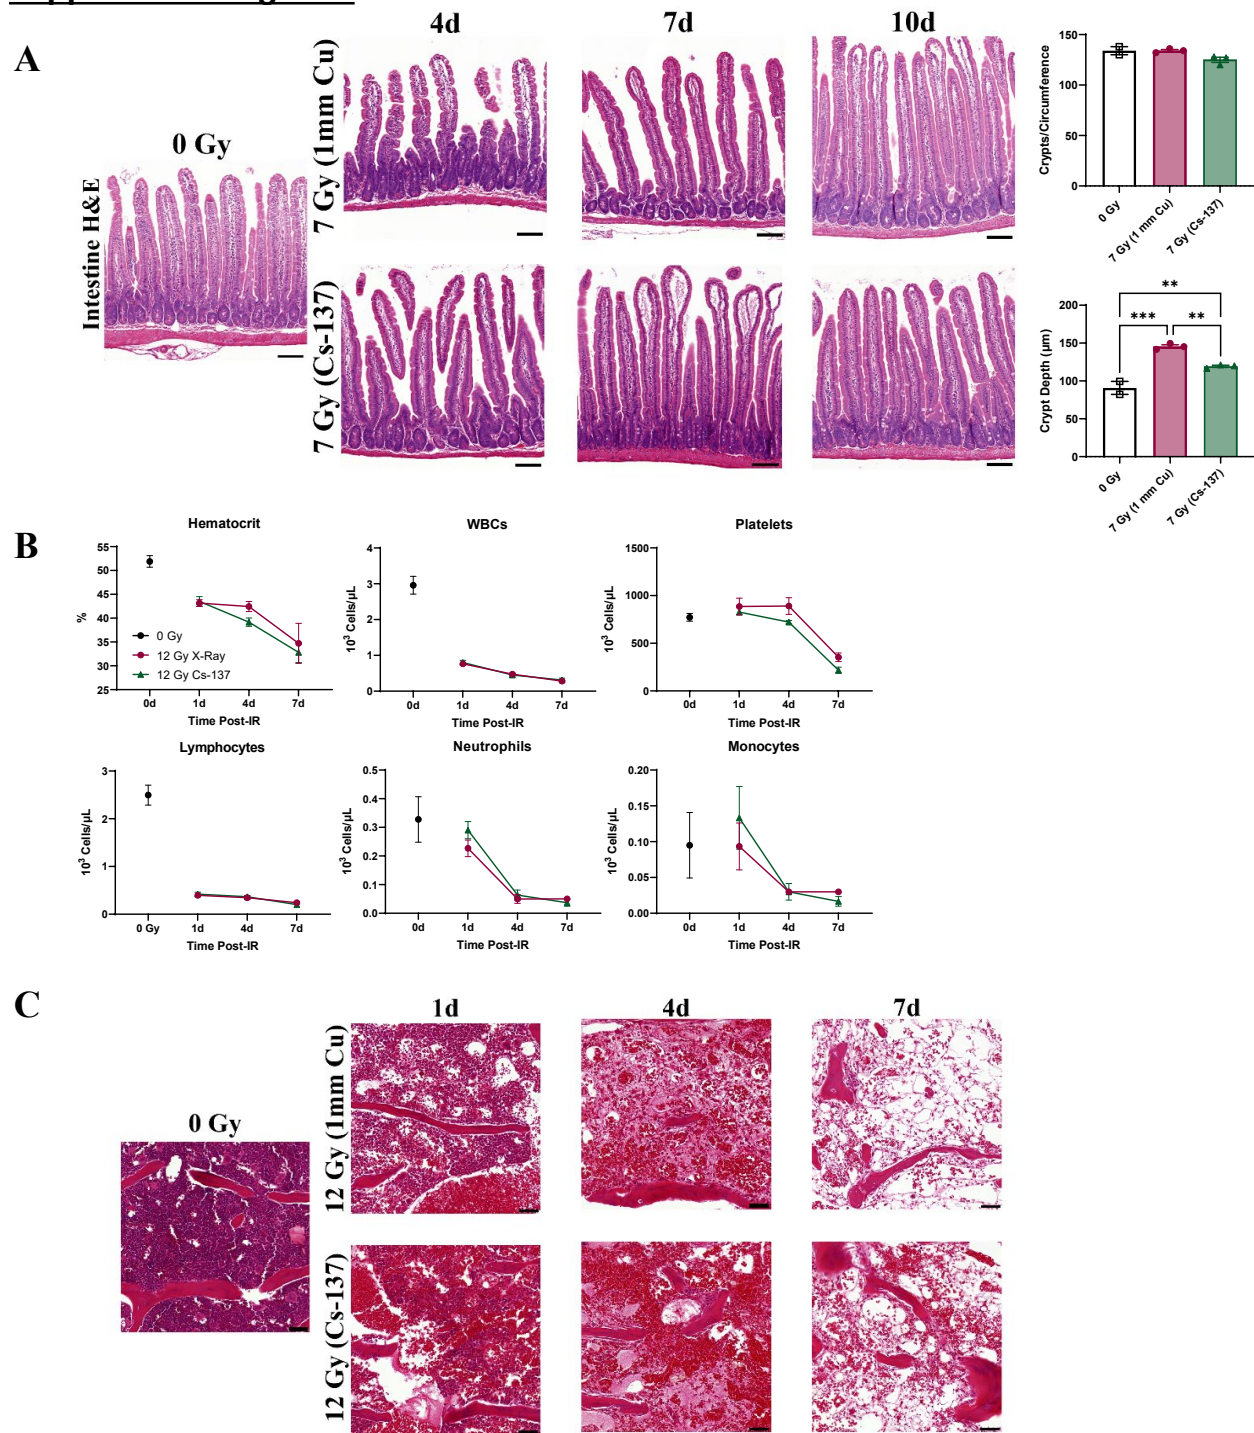

**Supplemental Figure 4:** (A) Representative H&E-stained intestines from 4-10 days post-irradiation with associated measurements of crypt depth and crypt loss. (B) Complete blood count parameters from 1-7 days post-irradiation. (C) Representative H&E-stained sternal bone marrow from 1-7 days post-irradiation

## Supplemental Figure 5

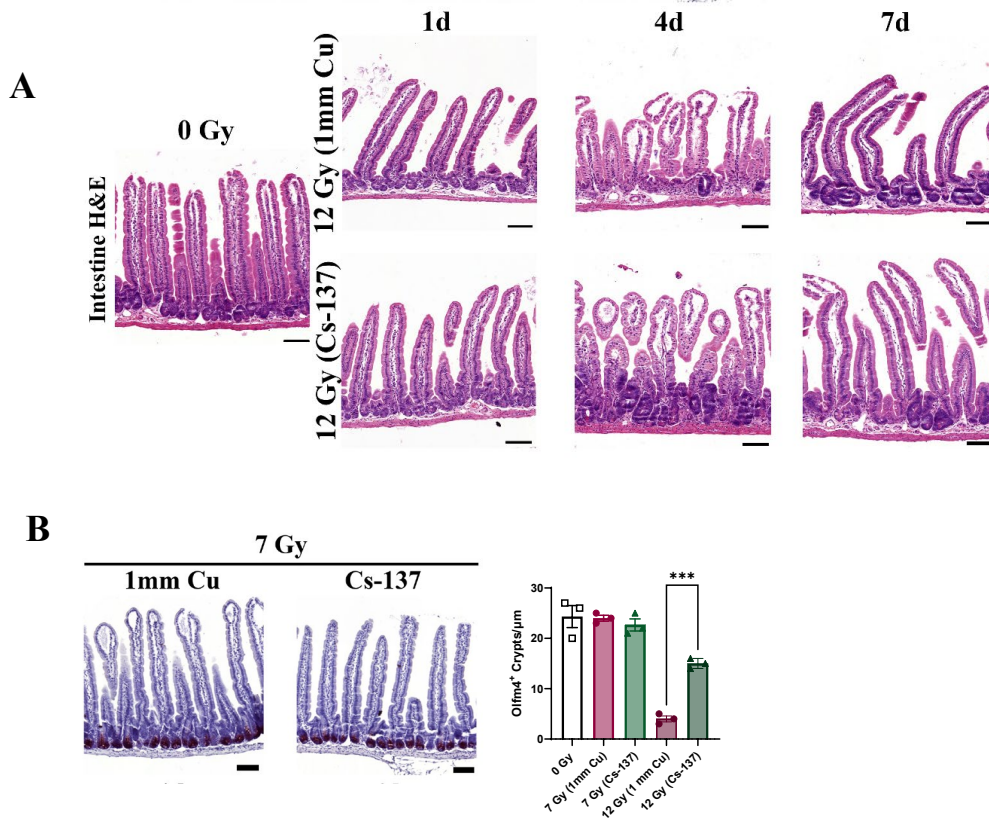

**Supplemental Figure 5:** (A) Representative H&E-stained intestines from 1-7 days post-irradiation. (B) Olfm4 IHC 4 days post-7 Gy WBI with associated counts per micron.
